sich immer der einfachsten Hilfsmittel bedienen, an Einzelfällen erläutert. So etwa im ersten Abschnitt, der den Leserkreis dieser Zeitschrift am meisten interessiert, die Auseinandersetzung über Täuschungen beim Schätzen grosser Wellenlängen (die infolge der Schwierigkeit, den Vorübergang des wirklichen Kammes zu erfassen, meistens unterschätzt werden). Besonderes Interesse werden auch die kritischen Mitteilungen über eigene und fremde Schätzungen grösster Wellendimensionen finden, unter denen Angaben über Höhen von reichlich 20 m. (Nördlicher Stiller Ozean) und von rund 25 m. aus dem Nordatlantischen Ozean für glaubwürdig befunden werden. (Diese letzte Angabe geht auf Schätzungen an Bord des Riesendampfers "Majestic" zurück, vgl. *The Marine Observer*, 1934, S. 105/08). Als besonderes Kennzeichen der Sturmwellen der zirkumantarktischen zusammenhängenden Weltmeerflächen (des "Southern Ocean" der Engländer) wird grosse Wellenlänge und — quer dazu — grosse Kammlänge, weniger aussergewöhnliche Wellenhöhe, hervorgehoben. Die Überschlagsrechnungen zu den Beobachtungen über Wind, Seeraum und Seegang werden manchen Leser vielleicht doch leise an eine Diskussionsbemerkung von G. Simpson zu ähnlichen Ausführungen des Verfassers erinnern, dass die gefundene Übereinstimmung zwischen Wind- und Wellengeschwindigkeit "zu gut erscheine, um wahr zu sein" (Quart. Journ. R. Met. Society, 1926, S. 127).

Das Buch ist durch eine grössere Anzahl ganzseitiger Abbildungen nach Aufnahmen des Verfassers geschmückt. Es stellt als Gemeinschaftsarbeit eines unermüdlichen Meisters der Beobachtung und eines Geophysikers eine dankenswerte Bereicherung der Literatur über Wellen dar.

*A. Schumacher.*

**C M. Maldura.** "Su l'unificazione dei metodi di analisi dei sali nutritivi e della silice in soluzione nell'acqua di mare." Boll. Pesca, Piscicol. e Idrobiol. Anno XI, Fasc. 3. Roma, 1935.

La Commission Internationale pour l'Exploration de la Méditerranée has proposed to study the biological stock of the Mediterranean in relation to the quantity of nitrates and phosphates in solution. Since the analyses of phosphates and nitrates made by Helge Thomsen on board the "Dana" showed that the Mediterranean is very poor in these salts, analytical methods may need to be even more sensitive than those we use in our northern waters. Maldura has therefore surveyed the literature and concludes that in general the existing methods are likely to suffice for such a study. While this may be so the small amounts present particularly in the eastern basin are likely to tax the skill of the analyst if a clear picture is to be obtained of the variations with place, depth, and season. Since the International Council for the Exploration of the Sea already has a Subcommittee charged with the task of preparing a report on this same subject, this seems a field where the two International Councils could collaborate to their mutual advantage. The greater transparency of the water and the greater intensity of the sunlight which enters the Mediterranean at an angle more nearly vertical than in our more northern waters suggest that chemical analyses made in conjunction with measurements of light penetration and of the vertical distribution of plankton organisms should prove of much value.

*L. H. N. C.*
